# Supplementary material
Source: MDPI journal article supplement (https://www.mdpi.com/1999-4907/5/11/2730)
Supplement: s1 [file s1]

**Table S1.** Proportional in individual monoterpene concentrations (mean ± standard error) (%) in response to various treatments in the xylem of the stem in *Pinus armandi* saplings. These seven monoterpenes constitutes more than 90% of the total monoterpenes of the xylem of the stems.

| **Individual Monoterpenes** | **Proportion of Individual Monoterpene Concentration (%)** | | | | | | | | |
| --- | --- | --- | --- | --- | --- | --- | --- | --- | --- |
| **Untreated Saplings** | | | ***L. qinlingenesis*-Inoculated Saplings** | | | **Mechanical Wounding Saplings** | | |
| **4 days** | **8 days** | **30 days** | **4 days** | **8 days** | **30 days** | **4 days** | **8 days** | **30 days** |
| α-Pinene | 55.7 ± 1.4 | 54.9 ± 2.8 | 58.11 ± 1.6 | 73.8 ± 2.7 | 66.3 ± 2.8 | 58.8 ± 5.3 | 75.2 ± 2.6 | 80.5 ± 3.1 | 77.6 ± 1.2 |
| β-Myrcene | 1.8 ± 0.14 | 3.0 ± 1.5 | 2.2 ± 1.7 | 1.8 ± 0.68 | 4.5 ± 1.6 | 5.3 ± 2.2 | 3.4 ± 1.1 | 2.6 ± 0.5 | 5.1 ± 1.2 |
| β-Pinene | 23.0 ± 15.7 | 22.6 ± 7.8 | 23 ± 9.5 | 5.4 ± 1.6 | 4.9 ± 0.1 | 4.7 ± 1.6 | 5.2 ± 0.8 | 3.5 ± 0.8 | 1.7 ± 0.1 |
| 3-Carene | 5.8 ± 2.7 | 5.7 ± 2.0 | 4.1 ± 2.2 | 0.4 ± 0.02 | 2.8 ± 2.4 | 0.3 ± 0.03 | 0.4 ± 0.2 | 0.6 ± 0.2 | 0.4 ± 0.07 |
| Bornyl Acetate | 0.5 ± 0.04 | 0.5 ± 0.06 | 0.6 ± 0.08 | 1.9 ± 0.2 | 1.0 ± 0.003 | 0.6 ± 0.04 | 2.0 ± 0.3 | 1.8 ± 0.2 | 1.4 ± 0.1 |
| Camphene | 1.2 ± 0.2 | 0.9 ± 0.3 | 0.9 ± 0.3 | 1.7 ± 0.2 | 0.7 ± 0.3 | 1.5 ± 0.3 | 1.5 ± 0.3 | 1.6 ± 0.2 | 1.4 ± 0.1 |
| Limonene + β-Phellandrene | 3.2 ± 0.7 | 3.4 ± 1.0 | 5.2 ± 0.7 | 7.3 ± 0.4 | 15.1 ± 1.9 | 25.7 ± 2.2 | 6.7 ± 0.3 | 6.9 ± 2.5 | 10.7 ± 0.4 |

**Table S2.** Proportional of individual monoterpene concentrations (mean ± standard error) (%) in response to various treatments in the phloem of the stem of *Pinus armandi* saplings. These six monoterpenes constitutes more than 90% of the total monoterpenes of the phloem of the stems.

| **Individual Monoterpenes** | **Proportion of Individual Monoterpene Concentration (%)** | | | | | | | | |
| --- | --- | --- | --- | --- | --- | --- | --- | --- | --- |
| **Untreated Saplings** | | | ***L. qinlingenesis*-Inoculated Saplings** | | | **Mechanical Wounding Saplings** | | |
| **4 days** | **8 days** | **30 days** | **4 days** | **8 days** | **30 days** | **4 days** | **8 days** | **30 days** |
| α-Pinene | 42.4 ± 1.5 | 43.5 ± 1.1 | 42.8 ± 1.9 | 44.4 ± 6.0 | 29.6 ± 1.1 | 29.2 ± 0.5 | 42.7 ± 1.3 | 48.1 ± 1.2 | 40.8 ± 0.7 |
| β-Myrcene | 15.4 ± 1.6 | 14.8 ± 2.1 | 15.2 ± 1.5 | 12.3 ± 2.5 | 16.5 ± 0.7 | 15.2 ± 2.5 | 13.8 ± 1.3 | 12.3 ± 4.2 | 15.8 ± 1.1 |
| β-Pinene | 5.3 ± 0.7 | 6.6 ± 0.8 | 4.7 ± 1.6 | 4.2 ± 0.2 | 9.5 ± 1.1 | 13± 2.3 | 4.6 ± 0.1 | 7.1 ± 0.2 | 2.7 ± 0.5 |
| Bornyl Acetate | 2.5 ± 0.4 | 2.1 ± 0.6 | 1.8 ± 0.3 | 1.7 ± 0.2 | 1.2 ± 0.6 | 0.8 ± 0.2 | 2.9 ± 0.2 | 1.1 ± 0.45 | 2.1 ± 0.6 |
| Camphene | 2.4 ± 1.1 | 1.9 ± 0.8 | 1.7 ± 0.5 | 1.7 ± 0.3 | 1.7 ± 0.3 | 1.1 ± 0.6 | 2.5 ± 0.2 | 1.7 ± 0.7 | 1.9 ± 0.4 |
| Limonene + β-Phellandrene | 22.9 ± 4.0 | 23.5 ± 2.1 | 26.3 ± 1.5 | 27.7 ± 1.6 | 37.3 ± 3.0 | 38.2 ± 3.4 | 28.1 ± 1.6 | 28.4 ± 6.8 | 32.1 ± 1.6 |

**Table S3.** Proportion of individual sesquiterpene concentrations (mean ± standard error) (%) in response to various treatments in xylem of stem in *Pinus armandi* saplings. These nine sesquiterpenes constitutes more than 90% of total sesquiterpene concentrations of xylem of stems.

| **Individual Sesquiterpenes** | **Proportion of Individual Sesquiterpene Concentration (%)** | | | | | | | | |
| --- | --- | --- | --- | --- | --- | --- | --- | --- | --- |
| **Untreated Saplings** | | | ***L. qinlingenesis*-Inoculated Saplings** | | | **Mechanical Wounding Saplings** | | |
| **4 days** | **8 days** | **30 days** | **4 days** | **8 days** | **30 days** | **4 days** | **8 days** | **30 days** |
| α-Copaene | 5.2 ± 1.7 | 5.8 ± 1.5 | 5.5 ± 1.4 | 1.2 ± 1.2 | 1.4 ± 0.9 | 4.3 ± 1.0 | 3.9 ± 0.4 | 2.2 ± 1.1 | 0.8 ± 0.8 |
| α-Cubebene | 16.8 ± 6.4 | 15.9 ± 6.2 | 17.3 ± 7.1 | 6.2 ± 0.8 | 4.4 ± 1.9 | 1.9 ± 0.8 | 4.5 ± 0.4 | 4.2 ± 1.6 | 6.7 ± 0.7 |
| α-Humulene | 4.9 ± 0.8 | 5.2 ± 0.6 | 4.7 ± 0.5 | 6.4 ± 0.4 | 5.9 ± 2.2 | 2 ± 0.6 | 5.9 ± 1.5 | 3.5 ± 0.2 | 3.4 ± 0.9 |
| α-Muurolene | 1.1 ± 1.0 | 0.9 ± 0.8 | 0.7 ± 0.4 | 1.5 ± 1.0 | 0.8 ± 0.7 | 1.8 ± 1.1 | 3 ± 0.2 | 1.7 ± 0.9 | 1.1 ± 0.6 |
| β-Caryophyllene | 26.2 ± 2.5 | 25.6 ± 3.1 | 27.2 ± 4.2 | 19.7 ± 1.3 | 24.8 ± 2.7 | 15.8 ± 5.8 | 22.1 ± 5.3 | 15.4 ± 0.7 | 13.4 ± 5.8 |
| δ-Cadinene | 0.3 ± 0.3 | 0.3 ± 0.1 | 0.6 ± 0.07 | 4.8 ± 1.3 | 4.3 ± 0.3 | 3.8 ± 0.7 | 6 ± 2.2 | 3.2 ± 1.2 | 1.2 ± 1.1 |
| Germacrene | 18.3 ± 1.1 | 19.1 ± 1.1 | 16 ± 0.2 | 24.5 ± 4.1 | 25.7 ± 4.8 | 44.8 ± 10.4 | 19.7 ± 3.9 | 37.5 ± 6.8 | 32.4 ± 13.7 |
| Germacrene d-4-ol | 4.8 ± 2.9 | 4.2 ± 2.1 | 3.4 ± 1.9 | 0.6 ± 0.5 | 0.1 ± 0.1 | 1.0 ± 0.5 | 3.1 ± 1.6 | 3.1 ± 1.3 | 2.8 ± 1.4 |
| Longifolene | 12.7 ± 2.7 | 13.4 ± 1.4 | 15.4 ± 1.0 | 25.7 ± 3.8 | 22.8 ± 1.2 | 22.6 ± 11.6 | 22.2 ± 7.8 | 22.5 ± 3.5 | 32.4 ± 7.6 |

**Table S4.** Proportion of individual sesquiterpene concentrations (mean ± standard error) (%) in response to various treatments in phloem of stem in *Pinus armandi* saplings. These seven sesquiterpenes constitutes more than 90% of total sesquiterpenes of phloem
of stem.

| **Individual Sesquiterpenes** | **Proportion of Individual Sesquiterpene Concentration (%)** | | | | | | | | |
| --- | --- | --- | --- | --- | --- | --- | --- | --- | --- |
| **Untreated Saplings** | | | ***L. qinlingenesis*-Inoculated Saplings** | | | **Mechanical Wounding Saplings** | | |
| **4 days** | **8 days** | **30 days** | **4 days** | **8 days** | **30 days** | **4 days** | **8 days** | **30 days** |
| α-Copaene | 2.4 ± 0.8 | 2.6 ± 0.7 | 2.3 ± 0.5 | 2.7 ± 0.3 | 1.9 ± 0.4 | 1.5 ± 0.5 | 1.1 ± 0.5 | 2.7 ± 1.5 | 2.2 ± 2.2 |
| α-Humulene | 6.9 ± 1.1 | 5.8 ± 1.3 | 6.0 ± 1.6 | 2.2 ± 0.9 | 5.1 ± 1.7 | 5.9 ± 2.0 | 6.5 ± 1.1 | 6.1 ± 2.8 | 3.6 ± 0.7 |
| α-Muurolene | 0.2 ± 0.06 | 0.2 ± 0.03 | 0.3 ± 0.05 | 1.3 ± 0.03 | 1.5 ± 0.04 | 2.3 ± 0.5 | 1.2 ± 0.09 | 1.6 ± 0.2 | 1.72 ± 0.2 |
| β-Caryophyllene | 25.4 ± 0.06 | 26. 5 ± 3.5 | 24.7 ± 6.1 | 10.2 ± 4.4 | 22.8 ± 8.5 | 21.3 ± 5.7 | 23.1 ± 2.8 | 21.9 ± 3.1 | 18.1 ± 3.4 |
| δ-Cadinene | 0.3 ± 0.1 | 0.4 ± 0.07 | 0.4 ± 0.1 | 1.2 ± 0.5 | 1.4 ± 0.08 | 3.1 ± 0.7 | 4.2 ± 0.2 | 1.9 ± 0.4 | 1.1 ± 0.4 |
| Germacrene | 53.9 ± 3.0 | 55.7 ± 4.2 | 55.1 ± 5.3 | 48.2 ± 4.7 | 36.4 ± 8.1 | 41.8 ± 8.5 | 43.2 ± 7.4 | 41.4 ± 5.5 | 35.4 ± 7.0 |
| Longifolene | 1.5 ± 1.2 | 1.6 ± 0.6 | 2.5 ± 8.2 | 29.2 ± 3.4 | 20 ± 2.4 | 14.9 ± 7.5 | 11 ± 2.4 | 15.3 ± 6.7 | 27.9 ± 8.2 |
